# Supplementary material for: Widespread, depth-dependent cortical microstructure alterations in pediatric focal epilepsy
Source: PubMed Central journal article supplement (PMC7616339; doi:10.1111/epi.17861), 2023-12-26
Supplement: EMS197250-supplement-Supporting_Information.pdf [file EMS197250-supplement-Supporting_Information.pdf]

**SUPPORTING INFORMATION**

Additional supporting information can be found online in the Supporting Information section at the end of this article.
